# Supplementary material for: Emulsion electrospinning of sodium alginate/poly(ε-caprolactone) core/shell nanofibers for biomedical applications
Source: Royal Society of Chemistry journal article supplement (doi:10.1039/d2na00201a), 2022-01-01

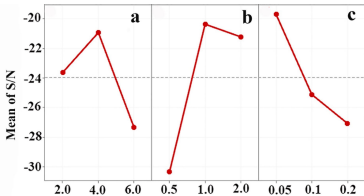

Supplement: d2na00201a2.pdf [file d2na00201a2.pdf]
