# Supplementary material for: Emulsion electrospinning of sodium alginate/poly(ε-caprolactone) core/shell nanofibers for biomedical applications
Source: Royal Society of Chemistry journal article supplement (doi:10.1039/d2na00201a), 2022-01-01
Supplement: d2na00201a4.pdf [file d2na00201a4.pdf]

## Supplementary Information

Table S1. Experimental design with mean PS<sub>45</sub> and standard deviation (SD)

| Run No. | ALG<br>Concentration<br>(w/v) | Span<br>Concentration<br>(w/w) | $\phi_{w/o}$ | PS <sub>45</sub> | SD   |
|---------|-------------------------------|--------------------------------|--------------|------------------|------|
| 1       | 2%                            | 0.5%                           | 0.2          | 38.3%            | 5.8% |
| 2       | 2%                            | 1%                             | 0.1          | 12.1%            | 2.9% |
| 3       | 2%                            | 2%                             | 0.05         | 7.1%             | 1.8% |
| 4       | 4%                            | 0.5%                           | 0.1          | 28%              | 3%   |
| 5       | 4%                            | 1%                             | 0.05         | 3.8%             | 1.1% |
| 6       | 4%                            | 2%                             | 0.2          | 12.3%            | 2.6% |
| 7       | 6%                            | 0.5%                           | 0.05         | 31.7%            | 4.3% |
| 8       | 6%                            | 1%                             | 0.2          | 23.2%            | 3.9% |
| 9       | 6%                            | 2%                             | 0.1          | 16.7%            | 2.4% |

The Mean signal-to-noise ratio (S/N) diagram for each factor can be seen in Figure S1. We can see that increasing ALG concentration from 2% to 4% leads to a significant increase in S/N, which means higher stability of the emulsion; while a further increase from 4% to 6% decreases the S/N remarkably. Similarly, raising the concentration of Span from 0.5% to 1% increases S/N while adding more Span has no major effect on the stability of the system and S/N does not change considerably. Additionally, the S/N variation trend of the effect of  $\phi_{w/o}$  indicates that a higher water to oil ratio, leads to less stability of the emulsion.

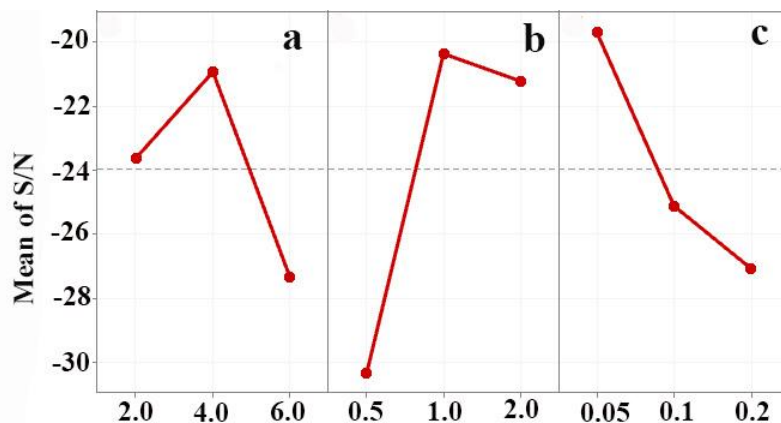

Figure S1. Mean of S/N for: (a) ALG concentration, (b) Span concentration and (c)  $\phi_{w/o}$ .

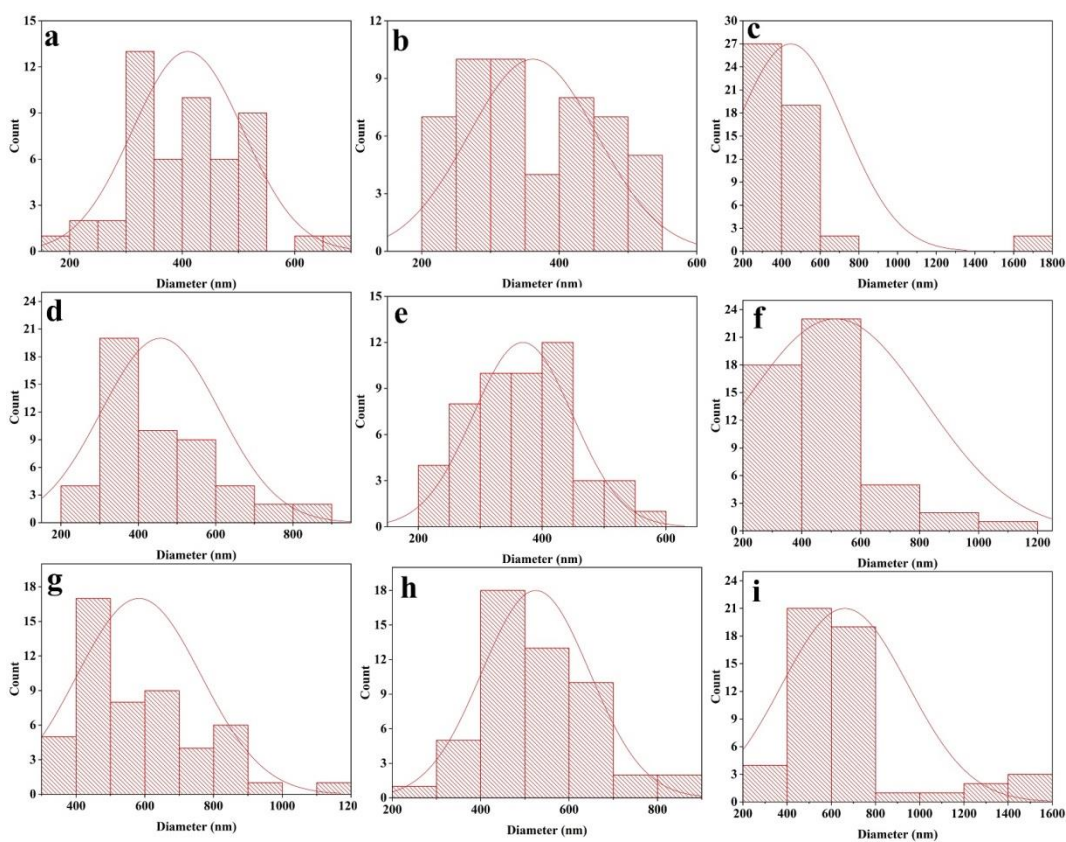

Figure S2. Fiber diameter distribution histograms prepared using ALG/PCL emulsions: (a)  $P_8-\Phi_{0.05}$ , (b)  $P_8-\Phi_{0.1}$ , (c)  $P_8-\Phi_{0.2}$ , (d)  $P_{10}-\Phi_{0.05}$ , (e)  $P_{10}-\Phi_{0.1}$ , (f)  $P_{10}-\Phi_{0.2}$ , (g)  $P_{12}-\Phi_{0.05}$ , (h)  $P_{12}-\Phi_{0.1}$  and (i)  $P_{12}-\Phi_{0.2}$ .
